# Supplementary material for: Integrating Clinical and Multiple Omics Data for Prognostic Assessment across Human Cancers
Source: PubMed Central journal article supplement (PMC5717223; doi:10.1038/s41598-017-17031-8), 2017-12-05
Supplement: 41598_2017_17031_MOESM1_ESM.pdf [file 41598_2017_17031_MOESM1_ESM.pdf]

## **Integrating Clinical and Multiple Omics Data for Prognostic Assessment across Human Cancers**

Bin Zhu<sup>1,\*</sup>, Nan Song<sup>2,\*</sup>, Ronglai Shen<sup>3,\*</sup>, Arshi Arora<sup>3</sup>, Mitchell J. Machiela<sup>1</sup>, Lei Song<sup>1</sup>, Maria Teresa Landi<sup>1</sup>, Debashis Ghosh<sup>4</sup>, Nilanjan Chatterjee<sup>5,6</sup>, Veera Baladandayuthapani<sup>7</sup> and Hongyu Zhao<sup>8</sup>

### Affiliations:

<sup>1</sup> Division of Cancer Epidemiology and Genetics, National Cancer Institute, National Institute of Health, Bethesda, MD 20892, USA

<sup>2</sup> NSABP Foundation, Pittsburgh, PA 15212, USA

<sup>3</sup> Department of Epidemiology and Biostatistics, Memorial Sloan-Kettering Cancer Center, New York, NY 10021, USA

<sup>4</sup> Department of Biostatistics and Informatics, University of Colorado Denver, Aurora, CO 80045, USA

<sup>5</sup> Department of Biostatistics, Bloomberg School of Public Health, Johns Hopkins University, Baltimore, MD 21205, USA

<sup>6</sup> Department of Oncology, School of Medicine, Johns Hopkins University, Baltimore, MD 21205, USA

<sup>7</sup> Department of Biostatistics, The University of Texas M. D. Anderson Cancer Center, Houston, TX 77230, USA

<sup>8</sup> Department of Biostatistics, Yale School of Public Health, New Haven, CT 06520, USA

\* Authors contributed equally

Running title: Integrative cancer prognostic assessment

Correspondences to:

Bin Zhu, Ph.D.

Principal Investigator

Biostatistics Branch

Division of Cancer Epidemiology and Genetics

National Cancer Institute

9609 Medical Center Drive, Room 7E618

Bethesda, MD 20892

[bin.zhu@nih.gov](mailto:bin.zhu@nih.gov)

Conflict of interest: The authors have nothing to disclose

## **Supplementary tables and figures:**

Table S1. Summary of patient demographic and clinical characteristics.

Table S2. The number of biomarkers in each omic platform across cancer types.

Figure S1. Pairwise kernel alignment among the five omic platforms (somatic mutation, copy number, methylation, mRNA and miRNA) in individual cancer types.

Figure S2. Pairwise Spearman correlation pattern in C-index between omic platforms.

Figure S3. Radar plot of C-index for individual and combination of omic profiles in individual cancer types alone (red lines), or in combination with clinical variables (light blue lines). The C-index for clinical variables alone are plotted in dotted dark blue lines.

Figure S4. Boxplots of C-indices of protein expression for various across cancer types by kernel machine learning method and Lasso respectively.

Figure S5. Boxplots of C-indices of protein expression and mRNA across cancer types

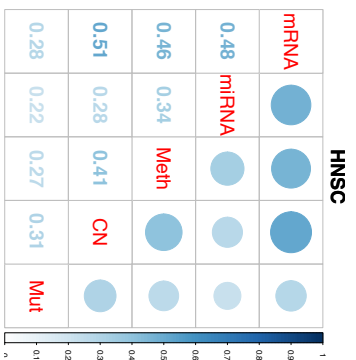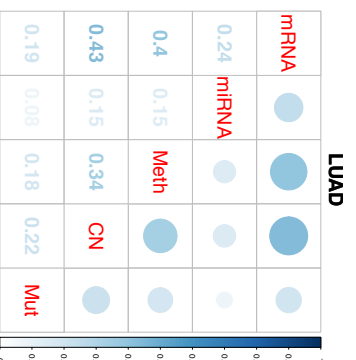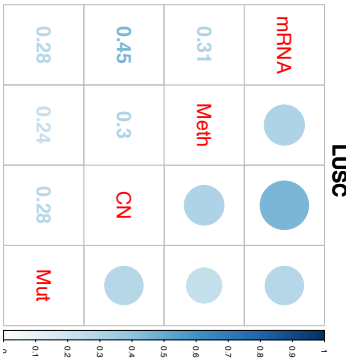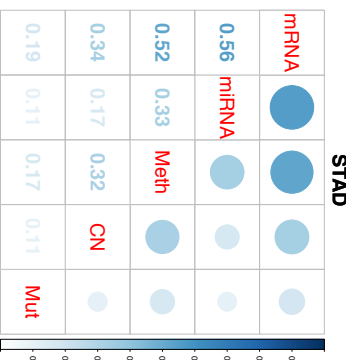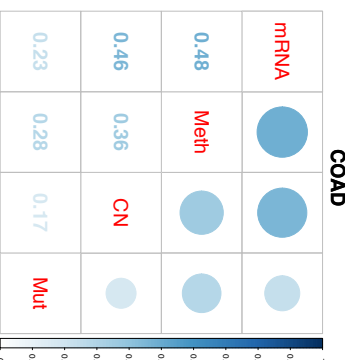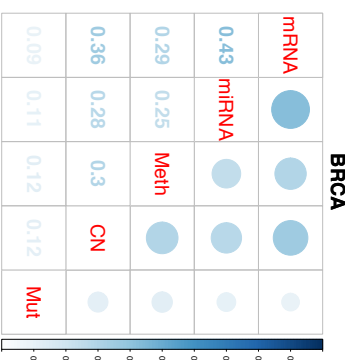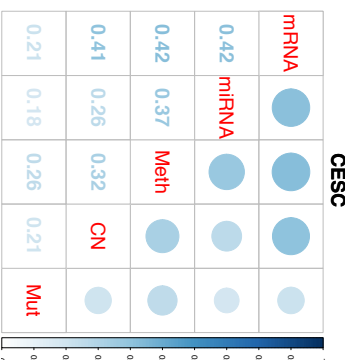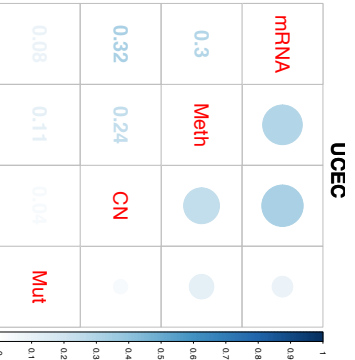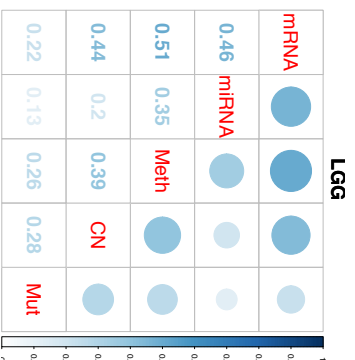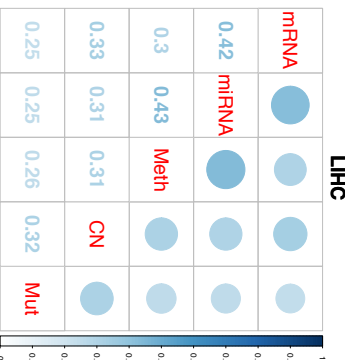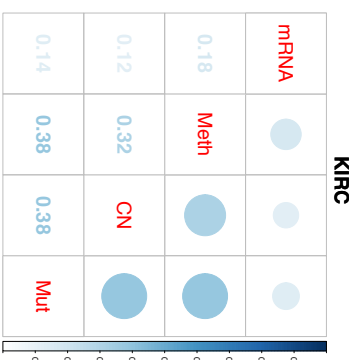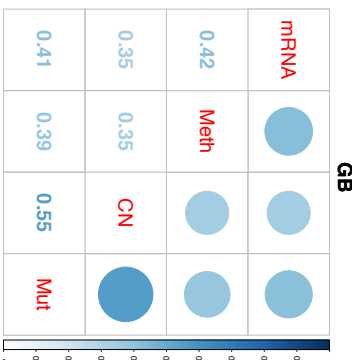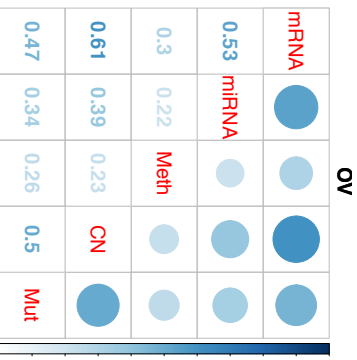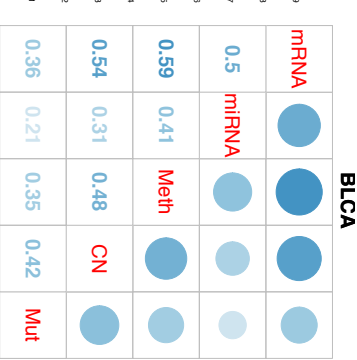

Supplementary Figure 1: Kernel alignment for each cancer type

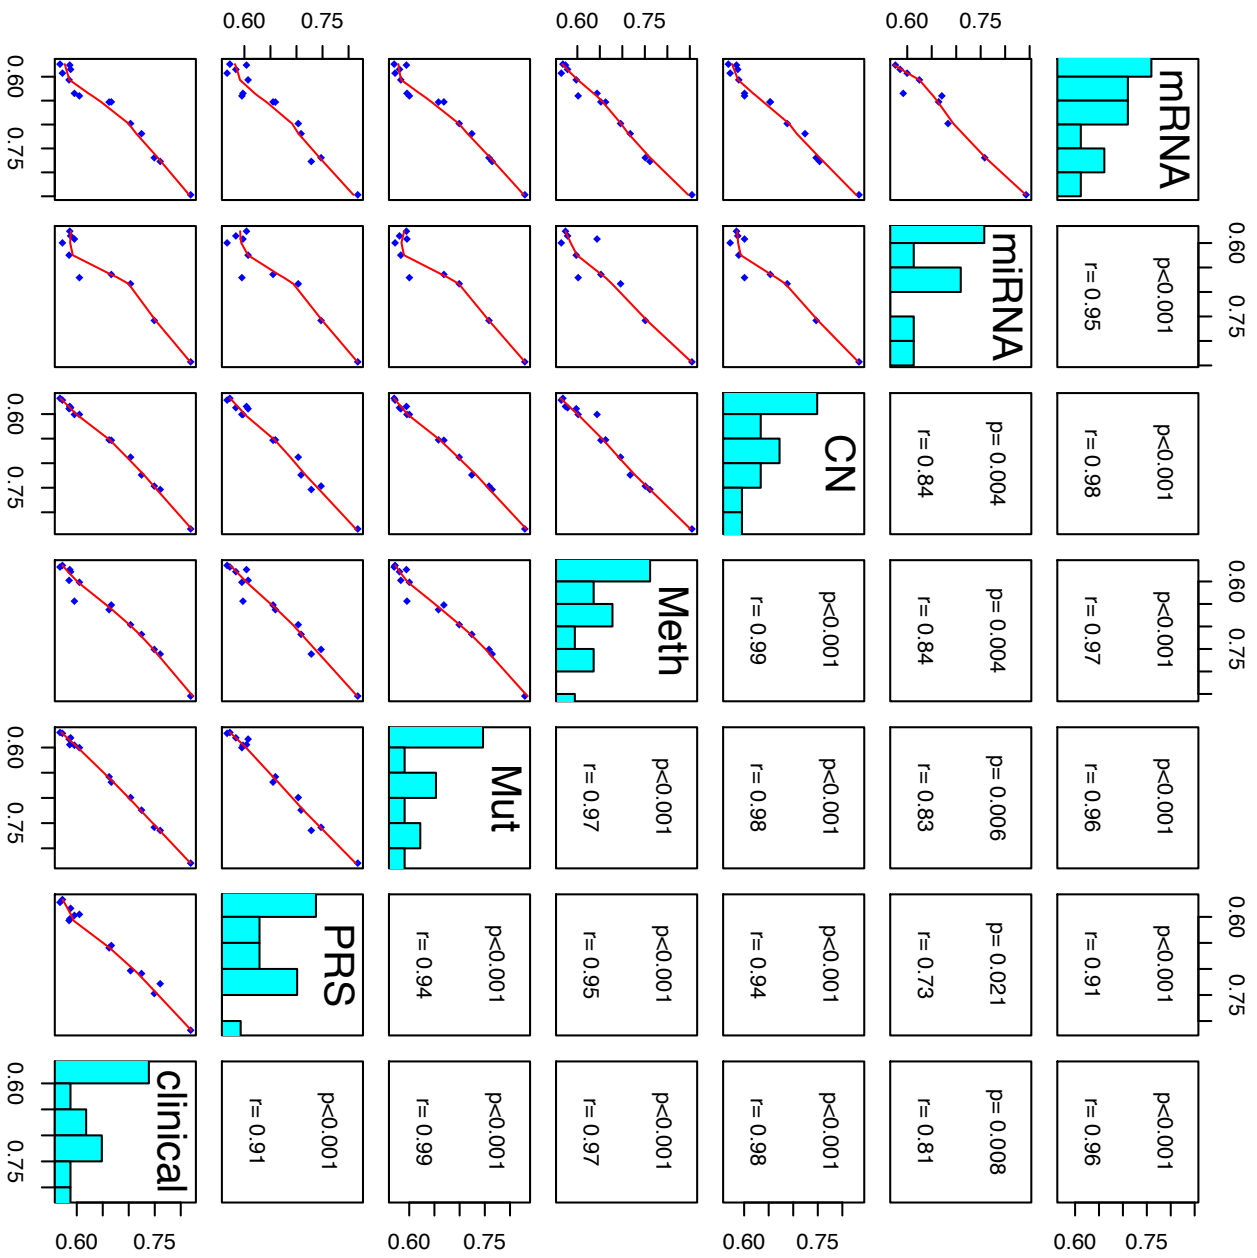

Supplementary Figure 2: Correlation plot including clinical factors

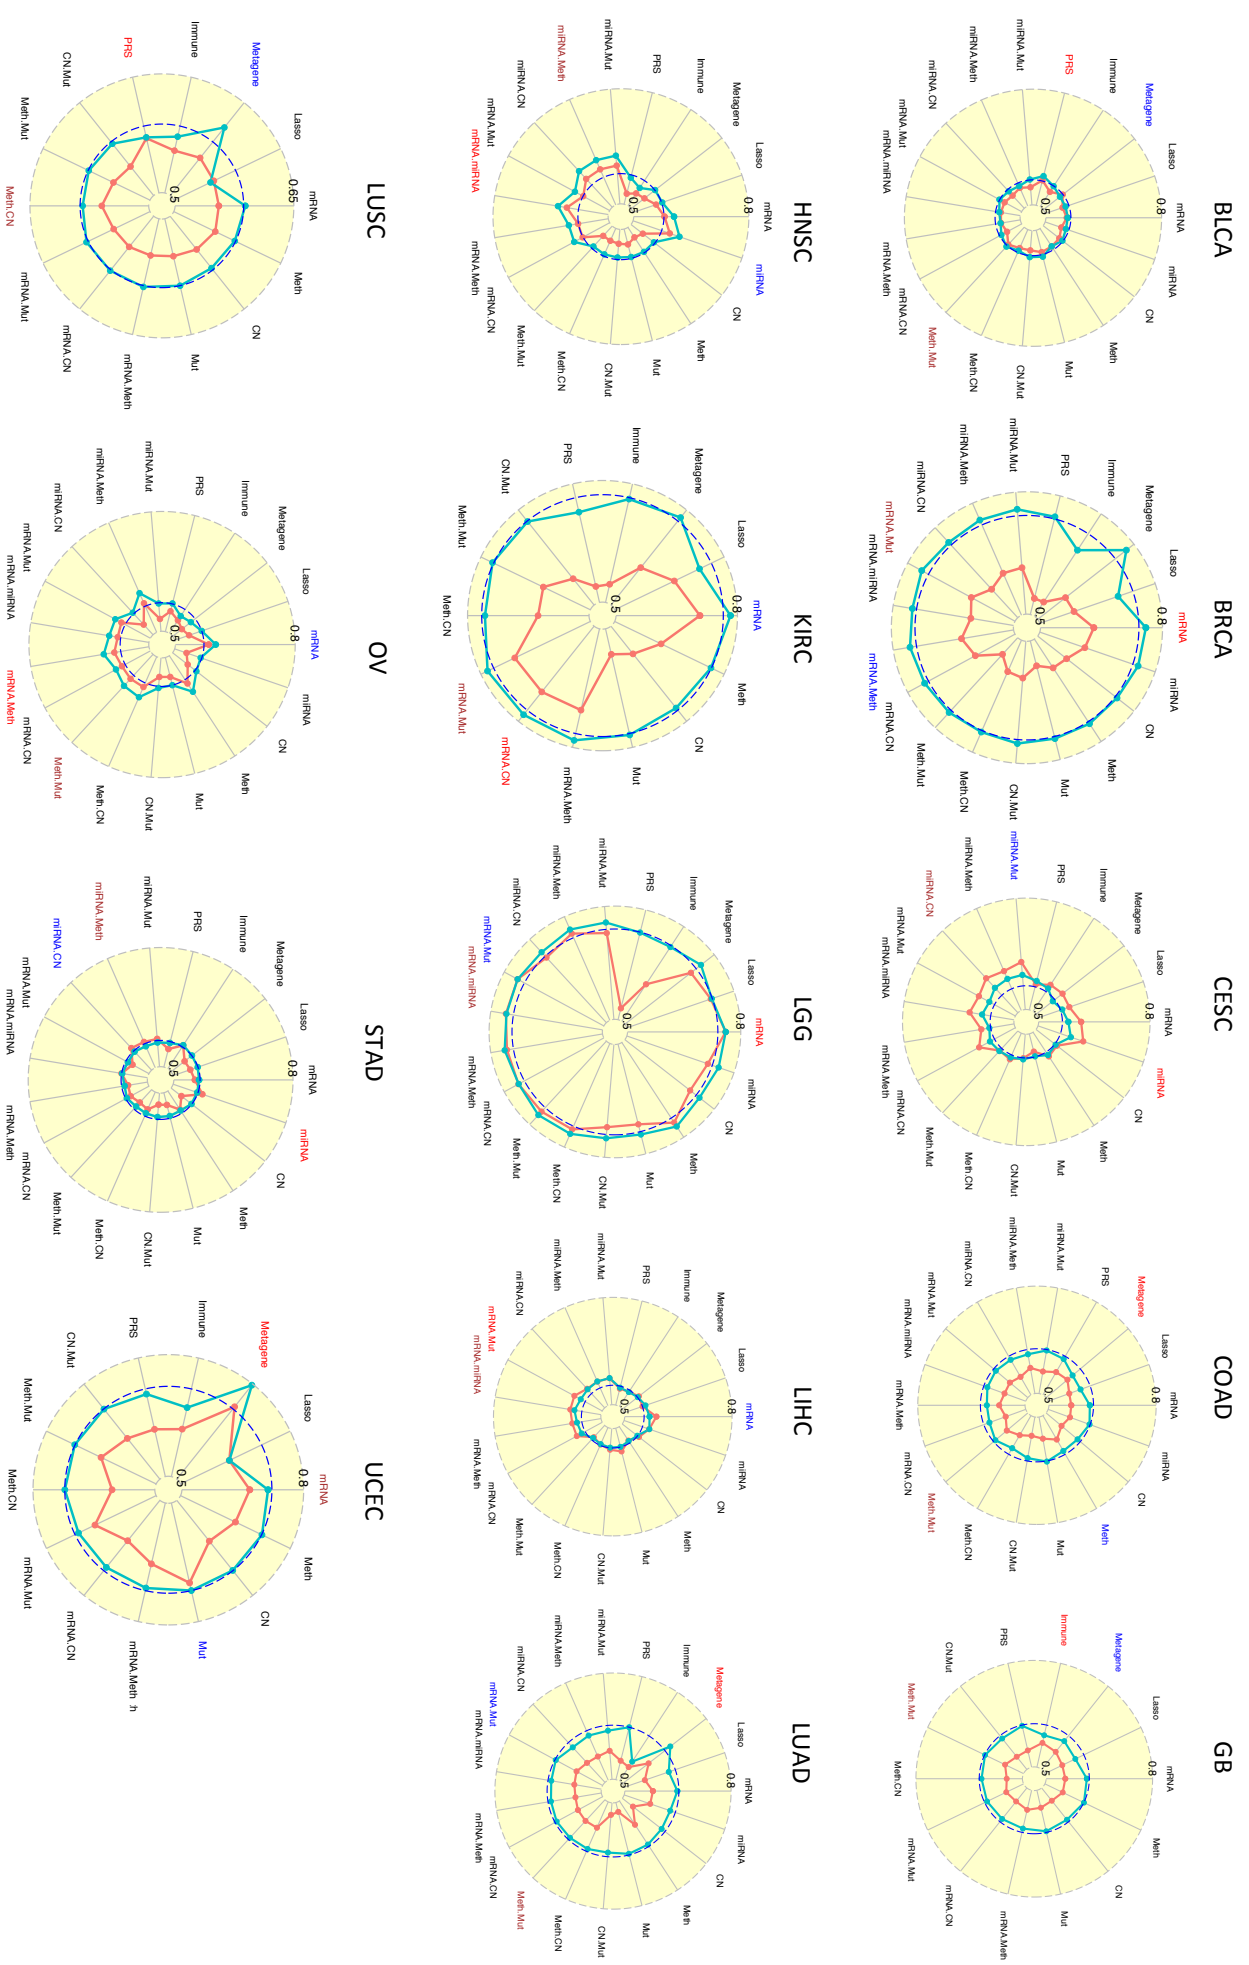

Supplementary Figure 3: Radar plots

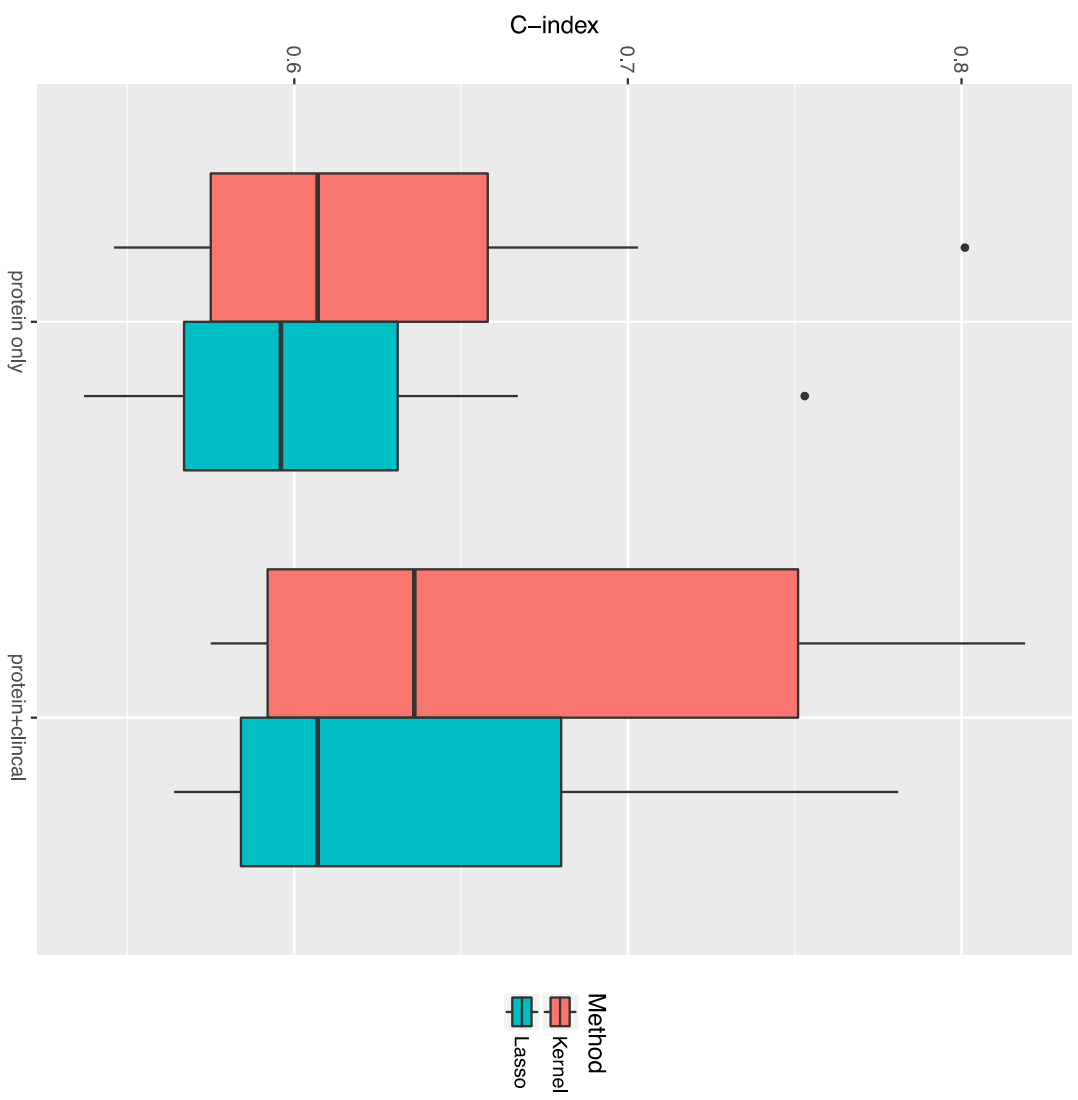

Supplementary Figure 4. Boxplots of C-indices of protein expression.

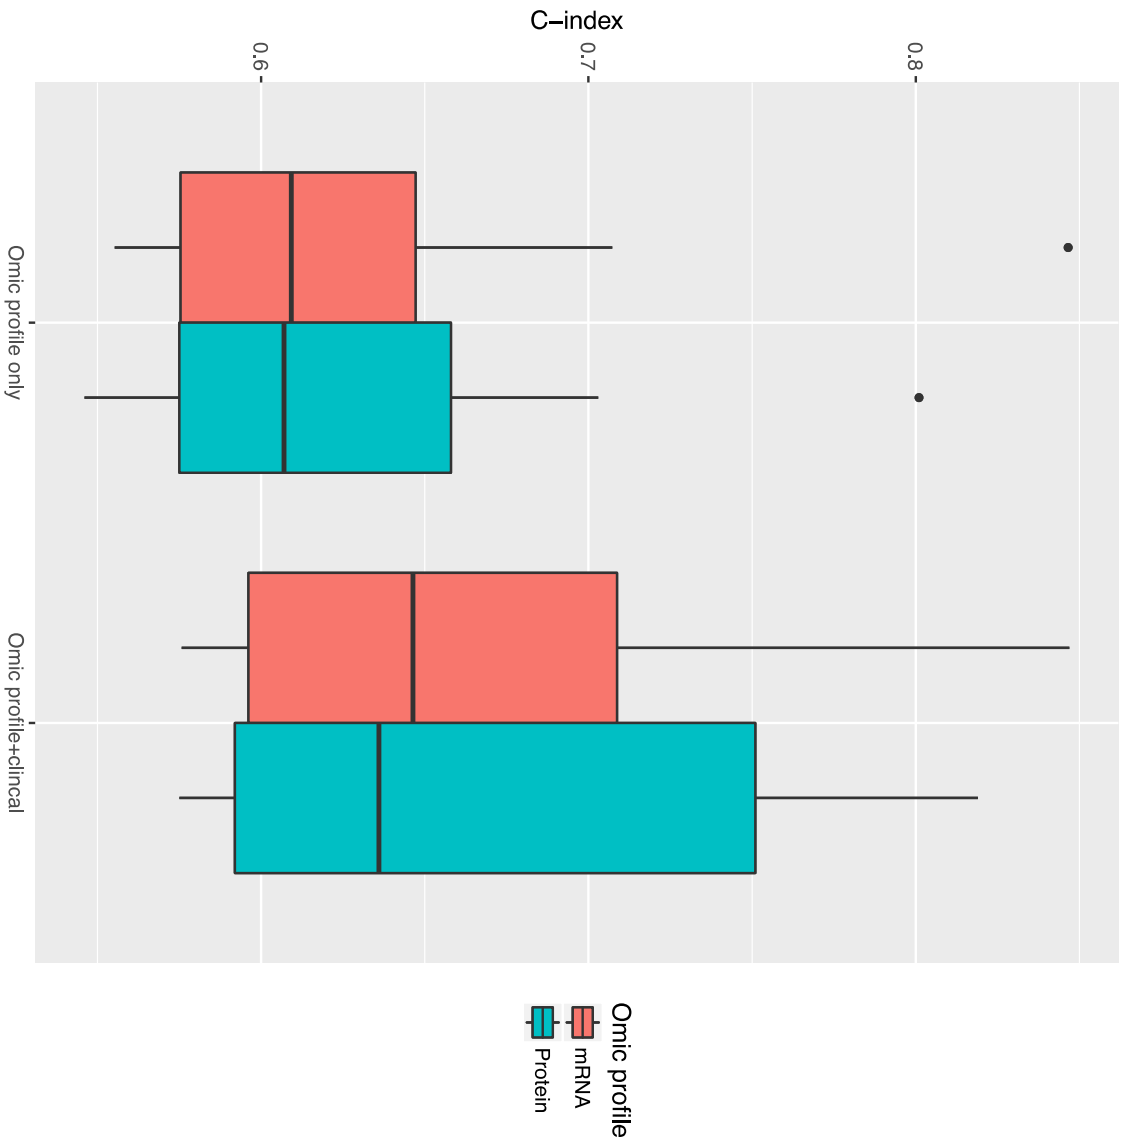

Supplementary Figure 5. Boxplots of C-indices of protein expression and mRNA

**Supplementary Table 1**

| Cancer | Total | Clinical information        | Level                     | Counts                 |
|--------|-------|-----------------------------|---------------------------|------------------------|
| BLCA   | 124   | age                         |                           | mean: 67.98; sd: 10.48 |
|        |       | gender                      | Male                      | 93                     |
|        |       |                             | Female                    | 31                     |
|        |       | stage                       | stage12                   | 88                     |
|        |       |                             | stage34                   | 36                     |
|        |       | survival                    | 0                         | 64                     |
|        |       |                             | 1                         | 60                     |
| BRCA   | 623   | age                         |                           | mean: 58.45; sd:13.06  |
|        |       | stage                       | stage12                   | 147                    |
|        |       |                             | stage34                   | 476                    |
|        |       | survival                    | 0                         | 529                    |
|        |       |                             | 1                         | 94                     |
| CESC   | 186   | age                         |                           | mean: 46.95; sd: 12.87 |
|        |       | stage                       | stage12                   | 149                    |
|        |       |                             | stage34                   | 37                     |
|        |       | survival                    | 0                         | 145                    |
|        |       |                             | 1                         | 41                     |
| COAD   | 182   | age                         |                           | mean:65; sd:13.35      |
|        |       | stage                       | stage12                   | 105                    |
|        |       |                             | stage34                   | 77                     |
|        |       | gender                      | Female                    | 81                     |
|        |       |                             | Male                      | 101                    |
|        |       | survival                    | 0                         | 143                    |
|        |       |                             | 1                         | 39                     |
| GB (4) | 66    | age                         |                           | mean:73.64; sd: 16.51  |
|        |       | gender                      | female                    | 19                     |
|        |       |                             | male                      | 47                     |
|        |       | karnofsky_performance_score |                           | mean:61.81; sd: 14.18  |
|        |       | survival                    | 0                         | 0                      |
|        |       |                             | 1                         | 66                     |
| HNSC   | 210   | age                         |                           | mean:61.72; sd:12.37   |
|        |       | stage                       | stage12                   | 56                     |
|        |       |                             |                           | 154                    |
|        |       |                             | neoplasm_histologic_grade | G1                     |
|        |       |                             | G2                        | 131                    |
|        |       |                             | G3,G4,GX                  | 59                     |
|        |       | survival                    | 0                         | 99                     |
| 1      | 111   |                             |                           |                        |



|                |                   |          |         |                      |        |                      |
|----------------|-------------------|----------|---------|----------------------|--------|----------------------|
| KIRC4          | 407               | age      |         | mean:60.85;sd:11.98  |        |                      |
|                |                   | stage    | stage1  | 232                  |        |                      |
|                |                   |          | stage2  | 108                  |        |                      |
|                |                   |          | stage34 | 67                   |        |                      |
|                |                   | gender   | female  | 140                  |        |                      |
|                |                   |          | male    | 267                  |        |                      |
|                |                   | grade    | 1       | 341                  |        |                      |
|                |                   |          | 3       | 66                   |        |                      |
|                |                   |          | 0       | 273                  |        |                      |
|                |                   | survival | 1       | 134                  |        |                      |
|                |                   |          |         |                      |        |                      |
| LUSC4          | 174               | age      |         | mean:67.62; sd: 8.37 |        |                      |
|                |                   | gender   | female  | 47                   |        |                      |
|                |                   |          | male    | 127                  |        |                      |
|                |                   | stage    | stage1  | 99                   |        |                      |
|                |                   |          | stage2  | 37                   |        |                      |
|                |                   |          | stage34 | 38                   |        |                      |
|                |                   | survival | 0       | 89                   |        |                      |
|                |                   |          | 1       | 85                   |        |                      |
|                |                   | LGG      | 277     | age                  |        | mean:42.85, sd:13.39 |
|                |                   |          |         | gender               | female | 123                  |
| male           | 154               |          |         |                      |        |                      |
| grade          | grade2            |          |         | 136                  |        |                      |
|                | grade3            |          |         | 141                  |        |                      |
| histology type | Astrocytoma       |          |         | 95                   |        |                      |
|                | Oligoastrocytoma  |          |         | 74                   |        |                      |
|                | Oligodendroglioma |          |         | 108                  |        |                      |
| survival       | 0                 |          |         | 219                  |        |                      |
|                | 1                 |          |         | 58                   |        |                      |
| LIHC           | 163               | age      |         | mean:59.42; sd:13.83 |        |                      |
|                |                   | gender   | female  | 54                   |        |                      |
|                |                   |          | male    | 109                  |        |                      |
|                |                   | grade    | G1      | 27                   |        |                      |
|                |                   |          | G2      | 83                   |        |                      |
|                |                   |          | G3      | 53                   |        |                      |
|                |                   | stage    | stage12 | 108                  |        |                      |
|                |                   |          | stage34 | 55                   |        |                      |
|                |                   | survival | 0       | 94                   |        |                      |
|                |                   |          | 1       | 69                   |        |                      |
| LUAD           | 378               | age      |         | mean:65.52; sd:9.78  |        |                      |
|                |                   | gender   | female  | 203                  |        |                      |
|                |                   |          | male    | 175                  |        |                      |
|                |                   | stage    | stage1  | 205                  |        |                      |

|       |     |                     |                        |                       |
|-------|-----|---------------------|------------------------|-----------------------|
|       |     |                     | stage2                 | 90                    |
|       |     |                     | stage34                | 83                    |
|       |     | survival            | 0                      | 94                    |
|       |     |                     | 1                      | 69                    |
| OV    | 144 | age                 |                        | mean:60.40, sd: 10.65 |
|       |     | stage               | stage12                | 9                     |
|       |     |                     | stage34                | 135                   |
|       |     | grade               | G2                     | 12                    |
|       |     |                     | G3                     | 132                   |
|       |     | TUMORRESIDUALDISEAS | 1-10 mm                | 78                    |
|       |     |                     | 11-20 mm               | 11                    |
|       |     |                     | >20mm                  | 24                    |
|       |     |                     | No Macroscopic disease | 31                    |
|       |     | survival            | 0                      | 52                    |
|       |     |                     | 1                      | 92                    |
| STAD  | 215 | age                 |                        | mean:65.45; sd: 10.34 |
|       |     | gender              | female                 | 80                    |
|       |     |                     | male                   | 135                   |
|       |     | stage               | stage12                | 111                   |
|       |     |                     | stage34                | 104                   |
|       |     | Lauren.Class        | diffuse                | 55                    |
|       |     |                     | Intestinal             | 141                   |
|       |     |                     | Mixed                  | 19                    |
|       |     | survival            | 0                      | 140                   |
|       |     |                     | 1                      | 75                    |
| UCEC4 | 233 | age                 |                        | mean:63.22; sd:10.91  |
|       |     | stage               | stage12                | 181                   |
|       |     |                     | stage34                | 52                    |
|       |     | Tumor Grade         | grade 1                | 70                    |
|       |     |                     | grade 2                | 72                    |
|       |     |                     | grade 3                | 91                    |
|       |     | histology           | serous                 | 42                    |
|       |     |                     | endometrioid+Mixed     | 191                   |
|       |     | survival            | 0                      | 210                   |
|       |     |                     | 1                      | 23                    |

Supplementary Table 2

| Cancer | N   | Meth (Methylation 450K) | mRNA (mRNA-seq) | CN (SNP6) | Mut (whole-exome DNA-seq) | miRNA |
|--------|-----|-------------------------|-----------------|-----------|---------------------------|-------|
| BLCA   | 124 | 384200                  | 16297           | 2855      | 13382                     | 482   |
| BRCA   | 623 | 22479                   | 16958           | 9783      | 17689                     | 833   |
| CESC   | 186 | 383925                  | 16284           | 8424      | 16453                     | 492   |
| COAD   | 182 | 22479                   | 16359           | 6766      | 18060                     | 443   |
| GB     | 66  | 22474                   | 12042           | 2821      | 9680                      |       |
| HNSC   | 210 | 384167                  | 16598           | 9761      | 14155                     | 496   |
| KIRC   | 407 | 23378                   | 17118           | 1695      | 13769                     |       |
| LGG    | 277 | 384208                  | 16908           | 4717      | 5960                      | 506   |
| LHC    | 163 | 385769                  | 15687           | 969       | 11759                     | 467   |
| LUAD   | 378 | 384146                  | 16647           | 9205      | 21056                     | 386   |
| LUSC   | 174 | 23523                   | 16850           | 676       | 14872                     |       |
| OV     | 144 | 22481                   | 16882           | 2990      | 10060                     | 389   |
| STAD   | 215 | 383984                  | 16654           | 1153      | 17172                     | 464   |
| UCEC   | 233 | 22488                   | 16472           | 523       | 19649                     |       |

N: Number of samples included in the analysis (with all four data types available)

CN: number of unique copy number regions. The number of regions vary across cancer type depending on the complexity of copy number landscape in each disease.

Meth: SNP and Sex chromosome probes were removed. KNN imputation was performed to impute missing value. Probes with greater than 20% missing were removed. Note that some of the disease types in earlier phase of TCGA including GBM, OV, KIRC, LUSC are 27K array data.

Mutation: list number of genes with at least one mutation observed in the cohort

mRNA: note RNA-seq data not available for GBM, Affy u133a array data was used for GBM
